# Supplementary material for: First report of anatoxin-a producing cyanobacteria in Australia illustrates need to regularly up-date monitoring strategies in a shifting global distribution
Source: PubMed Central journal article supplement (PMC6659621; doi:10.1038/s41598-019-46945-8), 2019-07-26
Supplement: 41598_2019_46945_MOESM1_ESM.pdf [file 41598_2019_46945_MOESM1_ESM.pdf]

**First report of anatoxin-a producing cyanobacteria in Australia illustrates need to regularly up-date monitoring strategies in a shifting global distribution.**

Nijoy John <sup>1,2,\*</sup>, Louise Baker <sup>2</sup>, Brendan R.E. Ansell <sup>2</sup>, Steven Newham <sup>3</sup>, Nicholas D. Crosbie <sup>4,5</sup>, Aaron R. Jex <sup>1,2</sup>

<sup>1</sup> *Faculty of Veterinary Science, The University of Melbourne, Parkville, Victoria 3010, Australia*

<sup>2</sup> *Population Health and Immunity Division, Walter and Eliza Hall Institute of Medical Research, Parkville, Victoria 3052, Australia*

<sup>3</sup> *Goulburn Valley Water, Shepparton, Victoria 3630, Australia*

<sup>4</sup> *Melbourne Water, Docklands, Victoria 3008, Australia*

<sup>5</sup> *School of Civil and Environmental Engineering, The University of New South Wales, Sydney, NSW, 2052, Australia*

\* Corresponding author. Current address: Population Health and Immunity Division, Walter and Eliza Hall Institute of Medical Research, Parkville, Victoria 3052, Australia. Tel.: +61 425490792; E-mail address: [njohn@student.unimelb.edu.au](mailto:njohn@student.unimelb.edu.au); [john.n@wehi.edu.au](mailto:john.n@wehi.edu.au) (Nijoy John)

**Table S1.** Microscopy, nested PCR, sequencing and ELISA results of a subset of cyanobacterial bloom samples tested in this study. Symbols; +, faint PCR band; ++, strong PCR band; +++, very strong PCR band; NA, not analysed. Previously reported ATX-a producing cyanobacteria characterised by isolation studies, molecular analysis and/or found to carry ATX-a synthetase gene required for ATX-a production are shown in bold. <sup>a</sup>; cell numbers (cells · mL<sup>-1</sup>)/biovolume (mm<sup>3</sup> · L<sup>-1</sup>) of potential ATX-a producers shown in bold.

| Sample number | Year sample collected | Location   | PCR result | NCBI BLASTn (% identity to <i>anaC</i> gene)                                                                                                                                                            | ELISA (µg · L <sup>-1</sup> ) | Microscopy <sup>a</sup>                                                                                                                                                                                                    |
|---------------|-----------------------|------------|------------|---------------------------------------------------------------------------------------------------------------------------------------------------------------------------------------------------------|-------------------------------|----------------------------------------------------------------------------------------------------------------------------------------------------------------------------------------------------------------------------|
| BGAUM1        | 2016                  | Yarrowonga | +          | NA                                                                                                                                                                                                      | NA                            | <i>Chrysochlorium ovalisporum</i> , <i>Cyanogranis</i> , <i>Planktolyngbya</i> , <i>Aphanocapsa</i> , <b><i>Cuspidothrix issatschenkoi</i> (736/0.04)</b>                                                                  |
| BGAUM2        | 2016                  | Yarrowonga | +          | NA                                                                                                                                                                                                      | NA                            | <i>C. ovalisporum</i> , <i>Cyanogranis</i> , <i>Planktolyngbya</i> , <i>Snowella</i> , <i>Aphanocapsa</i> , <i>Pseudanabaena</i> , <b><i>C. issatschenkoi</i> (326/0.01)</b> , <b><i>Dolichospermum</i> sp. (117/0.03)</b> |
| BGAUM3        | 2016                  | Yarrowonga | +          | NA                                                                                                                                                                                                      | NA                            | <i>C. ovalisporum</i> , <i>Planktolyngbya</i> , <i>Snowella</i> , <i>Cyanogranis</i>                                                                                                                                       |
| BGAUM4        | 2016                  | Yarrowonga | ++         | KX096813.1 Uncultured cyanobacterium (100%), JF803655.1 <i>Aphanizomenon</i> sp. 3 (99.7%), KM245024.1 <i>Cuspidothrix issatschenkoi</i> (99.4%), JF803647.1 <i>Dolichospermum circinale</i> 86 (89.7%) | 0.2                           | <i>C. ovalisporum</i> , <i>Planktolyngbya</i> , <i>Cyanogranis</i> , <i>Aphanocapsa</i> , <i>Pseudanabaena</i>                                                                                                             |
| BGAUM5        | 2016                  | Yarrowonga | +          | NA                                                                                                                                                                                                      | 0.2                           | <i>C. ovalisporum</i> , <i>Cyanogranis</i> , <i>Aphanocapsa</i> , <i>Planktolyngbya</i> , <i>Cyanodictyon</i> , <b><i>Dolichospermum</i> sp. (447/0.19)</b>                                                                |
| BGAUM8        | 2016                  | Wahgunyah  | +          | NA                                                                                                                                                                                                      | 0.15-0.2                      | <i>C. ovalisporum</i> , <i>Planktolyngbya</i> , <i>Merismopedia</i> , <b><i>Dolichospermum</i> sp. (512/0.14)</b>                                                                                                          |
| BGAUM9        | 2016                  | Wahgunyah  | +          | NA                                                                                                                                                                                                      | NA                            | <i>C. ovalisporum</i> , <i>Planktolyngbya</i> , <i>Aphanocapsa</i> , <i>Cyanogranis</i>                                                                                                                                    |
| BGAUM11       | 2016                  | Mulwala    | +          | NA                                                                                                                                                                                                      | 0.2                           | <i>C. ovalisporum</i> , <i>Aphanocapsa</i> , <i>Planktolyngbya</i> , <b><i>Dolichospermum</i> sp. (75/0.02)</b> , <b><i>C. issatschenkoi</i> (102/0.005)</b>                                                               |
| BGAUM14       | 2016                  | MV channel | +++        | KP036898.1 Uncultured cyanobacterium (100%),                                                                                                                                                            | 0.3                           | <i>C. ovalisporum</i> , <i>Planktolyngbya</i> , <i>Aphanocapsa</i> , <i>Cyanogranis</i> ,                                                                                                                                  |

|           |      |             |     |                                                                                                                                                                                                         |          |                                                                                                                                                            |
|-----------|------|-------------|-----|---------------------------------------------------------------------------------------------------------------------------------------------------------------------------------------------------------|----------|------------------------------------------------------------------------------------------------------------------------------------------------------------|
|           |      |             |     | KM245024.1 <i>C. issatschenkoi</i> (99.7%), JF803655.1 <i>Aphanizomenon</i> sp.3 (99.4%), JF803647.1 <i>D. circinale</i> 86 (89.7%)                                                                     |          |                                                                                                                                                            |
| BGAUM16   | 2016 | MV channel  | +   | NA                                                                                                                                                                                                      | 0.15-0.2 | <i>C. ovalisporum</i> , <i>Planktolyngbya</i> , <i>Aphanocapsa</i> , <i>Cyanogranis</i> , <b><i>Dolichospermum</i> sp. (80/0.02)</b>                       |
| BGAUM17   | 2016 | Picola      | +   | NA                                                                                                                                                                                                      | <0.15    | <i>C. ovalisporum</i> , <i>Planktolyngbya</i> , <i>Chroococcales</i> , <i>Geltierinema</i> , <b><i>Dolichospermum</i> sp. (220/0.078)</b>                  |
| BGAUM19   | 2016 | Numurkah    | +   | NA                                                                                                                                                                                                      | 0.2      | <i>C. ovalisporum</i> , <i>Planktolyngbya</i> , <i>Chroococcales</i> , <i>Raphidiopsis raciborskii</i>                                                     |
| BGAUM23   | 2016 | Barmah      | +   | NA                                                                                                                                                                                                      | NA       | <i>C.ovalisporum</i> , <i>Chroococcales</i> , <i>Planktolyngbya</i> , <i>C. raciborskii</i> , <b><i>C. issatschenkoi</i> (116/0.006)</b>                   |
| BGAUM25   | 2016 | Cobram      | ++  | KX096813.1 Uncultured cyanobacterium (100%), JF803655.1 <i>Aphanizomenon</i> sp. 3 (99.7%), KM245024.1 <i>Cuspidothrix issatschenkoi</i> (99.4%), JF803647.1 <i>Dolichospermum circinale</i> 86 (89.7%) | NA       | <i>C. ovalisporum</i> , <i>Chroococcales</i> , <i>Planktolyngbya</i> ,                                                                                     |
| BGAUM27   | 2016 | Numurkah    | +   | NA                                                                                                                                                                                                      | 0.8      | <i>C. ovalisporum</i> , <i>Chroococcales</i> , <i>Planktolyngbya</i> , <i>R. raciborskii</i>                                                               |
| BGAUM28   | 2016 | Numurkah    | +   | NA                                                                                                                                                                                                      | NA       | <i>C. ovalisporum</i> , <i>Chroococcales</i> , <i>Planktolyngbya</i> , <i>R. raciborskii</i>                                                               |
| BGAUM29   | 2016 | Nathalia    | +   | NA                                                                                                                                                                                                      | NA       | <i>C. ovalisporum</i> , <i>Chroococcales</i> , <i>Planktolyngbya</i> ,                                                                                     |
| BGAUM30   | 2016 | Barmah      | +   | NA                                                                                                                                                                                                      | 0.15-0.2 | <i>C. ovalisporum</i> , <i>Chroococcales</i> , <i>Planktolyngbya</i> , <b><i>C. issatschenkoi</i> (77/0.004), <i>Dolichospermum</i> sp. (115/0.032)</b>    |
| BGAUM32   | 2016 | Gunbower    | +   | NA                                                                                                                                                                                                      | NA       | <i>C. ovalisporum</i> , <i>Planktolyngbya</i>                                                                                                              |
| BGAUM33   | 2016 | Echuca      | +   | NA                                                                                                                                                                                                      | NA       | <i>C. ovalisporum</i> , <i>Cyanodictyon</i> , <i>Cyanogranis</i> , <i>Planktolyngbya</i> , <i>Aphanocapsa</i> , <i>Snowella</i>                            |
| BGAUMLB33 | 2011 | Merrimu     | +   | NA                                                                                                                                                                                                      | NA       | NA                                                                                                                                                         |
| BGAUM35   | 2016 | Pental      | +   | NA                                                                                                                                                                                                      | NA       | <i>C.ovalisporum</i> , <i>Aphanocapsa</i> , <i>Planktolyngbya</i>                                                                                          |
| BGAUM38   | 2016 | Torrumbarry | +++ | KX096813.1 Uncultured cyanobacterium (100%), JF803655.1 <i>Aphanizomenon</i> sp. 3 (99.7%), KM245024.1 <i>Cuspidothrix issatschenkoi</i> (99.4%), JF803647.1                                            | NA       | <i>C. ovalisporum</i> , <i>Planktolyngbya</i> , <i>Aphanocapsa</i> , <b><i>C. issatschenkoi</i>, (77/0.004)</b> <i>Aphanothece</i> , <i>R. raciborskii</i> |

|           |      |             |     |                                                                                                                                                                                  |     |                                                                                                                                                                                                                             |
|-----------|------|-------------|-----|----------------------------------------------------------------------------------------------------------------------------------------------------------------------------------|-----|-----------------------------------------------------------------------------------------------------------------------------------------------------------------------------------------------------------------------------|
|           |      |             |     | <i>Dolichospermum circinale</i> 86 (89.7%)                                                                                                                                       |     |                                                                                                                                                                                                                             |
| BGAUMLB39 | 2011 | Merrimu     | +   | NA                                                                                                                                                                               | NA  | NA                                                                                                                                                                                                                          |
| BGAUMLB40 | 2011 | Pykes Creek | +   | NA                                                                                                                                                                               | NA  | NA                                                                                                                                                                                                                          |
| BGAUM45   | 2016 | Piangil     | +   | NA                                                                                                                                                                               | NA  | <i>C. ovalisporum</i> , <i>Planktolyngbya</i> , <i>Aphanocapsa</i> , <i>Cyanogranis</i> , <i>Microcystis</i> ,                                                                                                              |
| BGAUM46   | 2016 | Nyah        | +++ | KP036898.1 Uncultured cyanobacterium (100%), KM245024.1 <i>C. issatschenkoi</i> (99.7%), JF803655.1 <i>Aphanizomenon</i> sp.3 (99.4%), JF803647.1 <i>D. circinale</i> 86 (89.7%) | 0.5 | <i>C. ovalisporum</i> , <b><i>C. issatschenkoi</i> (82/0.004)</b> , <i>Planktolyngbya</i> , <i>Cyanogranis</i> , <i>Cyanodictyon</i> , <i>Aphanocapsa</i>                                                                   |
| BGAUM48   | 2016 | Nyah        | +++ | KP036898.1 Uncultured cyanobacterium (100%), KM245024.1 <i>C. issatschenkoi</i> (99.7%), JF803655.1 <i>Aphanizomenon</i> sp.3 (99.4%), JF803647.1 <i>D. circinale</i> 86 (89.7%) | 0.2 | <i>C. ovalisporum</i> , <i>Planktolyngbya</i> , <i>Aphanocapsa</i> , <i>Cyanogranis</i> , <b><i>C. issatschenkoi</i> (112/0.006)</b>                                                                                        |
| BGAUM52   | 2016 | Pental      | +   | NA                                                                                                                                                                               | NA  | <i>C. ovalisporum</i> , <i>Plantolyngbya</i> , <i>Cyanodictyon</i> , <i>Aphanotece</i>                                                                                                                                      |
| BGAUM56   | 2016 | Yarrowonga  | +   | NA                                                                                                                                                                               | NA  | <i>C.ovalisporum</i> , <i>Planktolyngbya</i> , <i>Cyanogranis</i> , <b><i>Dolichospermum</i> sp. (200/0.056)</b> , <b><i>C. issatschenkoi</i> (99/0.005)</b>                                                                |
| BGAUM59   | 2016 | Torrumbarry | +   | NA                                                                                                                                                                               | NA  | <i>C. ovalisporum</i> , <i>Planktolyngbya</i> , <i>Aphanocapsa</i> , <i>Cyanogranis</i> , <i>Aphanothece</i> , <i>C. raciborskii</i> & <b><i>Dolichospermum</i> sp. (83/0.02)</b>                                           |
| BGAUM67   | 2016 | Wemen       | +   | NA                                                                                                                                                                               | 0.3 | <i>Aphanocapsa</i> , <i>Aphanothece</i> , <i>Cyanogranis</i> , <i>C. ovalisporum</i> , <b><i>Dolichospermum</i> sp. (1629/0.7)</b> , <b><i>C. issatschenkoi</i> (106/0.006)</b>                                             |
| BGAUM77   | 2016 | Wemen       | +   | NA                                                                                                                                                                               | NA  | <i>Aphanocapsa</i> , <i>Aphanothece</i> , <i>Cyanodicyon</i> , <i>Cyanogranis</i> , <i>Planktolyngbya</i> , <i>C. ovalisporum</i> , <b><i>Dolichospermum</i> sp. (177/0.05)</b> , <b><i>C. issatschenkoi</i> (265/0.01)</b> |
| BGAUM82   | 2016 | Piangil     | +++ | KP036898.1 Uncultured cyanobacterium (100%), KM245024.1 <i>C. issatschenkoi</i> (99.7%), JF803655.1 <i>Aphanizomenon</i> sp.3 (99.4%),                                           | 0.5 | <i>C. ovalisporum</i> , <i>Planktolyngbya</i> , <i>Aphanocapsa</i> , <b><i>C. issatschenkoi</i> (1129/0.06)</b> , <i>Pseudanabaena</i> , <i>Cyanogranis</i>                                                                 |

|         |      |          |     |                                                                                                                                                                                  |      |                                                                                                                                                                                     |
|---------|------|----------|-----|----------------------------------------------------------------------------------------------------------------------------------------------------------------------------------|------|-------------------------------------------------------------------------------------------------------------------------------------------------------------------------------------|
|         |      |          |     | JF803647.1 <i>D. circinale</i> 86 (89.7%)                                                                                                                                        |      |                                                                                                                                                                                     |
| BGAUM86 | 2016 | Pental   | +++ | KP036898.1 Uncultured cyanobacterium (100%), KM245024.1 <i>C. issatschenkoi</i> (99.7%), JF803655.1 <i>Aphanizomenon</i> sp.3 (99.4%), JF803647.1 <i>D. circinale</i> 86 (89.7%) | 0.5  | <i>C. ovalisporum</i> , <i>Planktolyngbya</i> , <i>Cyanogranis</i> , <i>Aphanocapsa</i> , <b><i>C. issatschenkoi</i> (93/0.005)</b> , <b><i>Dolichospermum</i> sp. (54/0.023)</b> , |
| BGAUM88 | 2016 | Piangil  | +++ | KP036898.1 Uncultured cyanobacterium (100%), KM245024.1 <i>C. issatschenkoi</i> (99.7%), JF803655.1 <i>Aphanizomenon</i> sp.3 (99.4%), JF803647.1 <i>D. circinale</i> 86 (89.7%) | 0.5  | <i>C. ovalisporum</i> , <i>Planktolyngbya</i> , <i>Cyanogranis</i> , <b><i>C. issatschenkoi</i> (581/0.03)</b>                                                                      |
| BGAUM89 | 2016 | Wemen    | +   | NA                                                                                                                                                                               | NA   | <i>Aphanocapsa</i> , <i>Planktolyngbya</i> , <i>Cyanogranis</i>                                                                                                                     |
| BGAUM92 | 2016 | Mulwala  | +   | NA                                                                                                                                                                               | NA   | <i>C. ovalisporum</i> , <i>Planktolyngbya</i> , <i>cyanogranis</i> ,                                                                                                                |
| BGAUM93 | 2016 | Nyah     | +++ | KP036898.1 Uncultured cyanobacterium (100%), KM245024.1 <i>C. issatschenkoi</i> (99.7%), JF803655.1 <i>Aphanizomenon</i> sp.3 (99.4%), JF803647.1 <i>D. circinale</i> 86 (89.7%) | 0.35 | <i>C. ovalisporum</i> , <i>Planktolyngbya</i> , <i>Aphanocapsa</i> , <i>Cyanogranis</i> , <b><i>C. issatschenkoi</i> (2060/0.117)</b> , <i>Pseudanabaena</i> , <i>Aphanothece</i> , |
| BGAUM94 | 2016 | Numurkah | +   | NA                                                                                                                                                                               | NA   | <i>C. ovalisporum</i> , <i>Planktolyngbya</i> , <i>Chroococcales</i> , <i>R. raciborskii</i>                                                                                        |
| BGAUM96 | 2016 | Nathalia | +++ | KP036898.1 Uncultured cyanobacterium (100%), KM245024.1 <i>C. issatschenkoi</i> (99.7%), JF803655.1 <i>Aphanizomenon</i> sp.3 (99.4%), JF803647.1 <i>D. circinale</i> 86 (89.7%) | 1.6  | <i>C. ovalisporum</i> , <i>Chroococcales</i> , <i>Planktolyngbya</i> ,                                                                                                              |
| BGAUM98 | 2016 | Numurkah | +++ | KX096813.1 Uncultured cyanobacterium (100%), JF803655.1 <i>Aphanizomenon</i> sp. 3 (99.7%), KM245024.1 <i>Cuspidothrix issatschenkoi</i> (99.4%), JF803647.1                     | NA   | <i>C. ovalisporum</i> , <i>Planktolyngbya</i> , <i>Chroococcales</i> , <i>R. raciborskii</i>                                                                                        |

|            |      |              |     |                                                                                                                                                                                  |       |                                                                                                                                                                                                             |
|------------|------|--------------|-----|----------------------------------------------------------------------------------------------------------------------------------------------------------------------------------|-------|-------------------------------------------------------------------------------------------------------------------------------------------------------------------------------------------------------------|
|            |      |              |     | <i>Dolichospermum circinale</i> 86 (89.7%)                                                                                                                                       |       |                                                                                                                                                                                                             |
| BGAUM99    | 2016 | Barmah       | +   | NA                                                                                                                                                                               | NA    | <i>C. ovalisporum</i> , <i>Chroococcales</i> , <i>Planktolyngbya</i> , <i>R. raciborskii</i> , <b><i>C. issatschenkoi</i> (116/0.006)</b>                                                                   |
| BGAUM102   | 2016 | Leitchville  | +   | NA                                                                                                                                                                               | NA    | <i>C. ovalisporum</i> , <i>Planktolyngbya</i> , <i>Chroococcales</i>                                                                                                                                        |
| BGAUM105   | 2016 | Pental       | +++ | KP036898.1 Uncultured cyanobacterium (100%), KM245024.1 <i>C. issatschenkoi</i> (99.7%), JF803655.1 <i>Aphanizomenon</i> sp.3 (99.4%), JF803647.1 <i>D. circinale</i> 86 (89.7%) | 0.2   | <i>Planktolyngbya</i> , <i>Aphanocapsa</i> , <i>Cyanogranis</i> , <i>Pseudanabaena</i> , <i>C. ovalisporum</i> , <i>R. raciborskii</i>                                                                      |
| BGAUM109   | 2016 | Yarrowonga   | +++ | KP036898.1 Uncultured cyanobacterium (100%), KM245024.1 <i>C. issatschenkoi</i> (99.7%), JF803655.1 <i>Aphanizomenon</i> sp.3 (99.4%), JF803647.1 <i>D. circinale</i> 86 (89.7%) | 0.2   | <i>C. ovalisporum</i> , <i>Planktolyngbya</i> , <i>Cyanogranis</i> , <i>Cyanodictyon</i> , <b><i>C. issatschenkoi</i> (588/0.03)</b> , <b><i>Dolichospermum</i> sp. (100/0.007)</b> <i>Microcystis</i>      |
| BGAUM110   | 2016 | Yarrowonga   | n   | NA                                                                                                                                                                               | <0.15 | <i>C. ovalisporum</i> , <i>Cyanogranis</i> , <i>Planktolyngbya</i> , <i>Pseudanabaena</i> , <i>Aphanothece</i> , <b><i>C. issatschenkoi</i> (114/0.006)</b> , <b><i>Dolichospermum</i> sp. (64/0.001)</b> . |
| BGAUM135   | 2016 | Pental       | n   | NA                                                                                                                                                                               | NA    | NA                                                                                                                                                                                                          |
| BGAUM156   | 2016 | Pental       | n   | NA                                                                                                                                                                               | <0.15 | <i>C. ovalisporum</i> , <i>Chroococcales</i> , <i>Planktolyngbya</i> , <b><i>C. issatschenkoi</i> (4073/0.23)</b> , <b><i>Dolichospermum</i> sp. (940/0.08)</b>                                             |
| BGAUM160   | 2016 | Yarrowonga   | n   | NA                                                                                                                                                                               | <0.15 | <i>C.ovalisporum</i> , <i>Cyanogranis</i> , <i>Planktolyngbya</i>                                                                                                                                           |
| BGAUM165   | 2016 | Wemen        | n   | NA                                                                                                                                                                               | NA    | <i>C. ovalisporum</i> , <i>Planktolyngbya</i> , <i>Aphanocapsa</i> , <i>Cyanogranis</i>                                                                                                                     |
| BGAUM171   | 2016 | Nyah         | n   | NA                                                                                                                                                                               | NA    | <i>Planktolyngbya</i> , <i>Cyanogranis</i> , <i>Cyanodictyon</i> , <i>Aphanocapsa</i>                                                                                                                       |
| BGAUM175   | 2016 | Wemen        | n   | NA                                                                                                                                                                               | NA    | <i>C. ovalisporum</i> , <i>Chroococcales</i> , <i>Planktolyngbya</i> , <b><i>C. issatschenkoi</i> (24/0.001)</b>                                                                                            |
| BGAUMLB176 | 2012 | Rowville     | +   | NA                                                                                                                                                                               | NA    | NA                                                                                                                                                                                                          |
| BGAUMLB177 | 2012 | Monbulk      | +   | NA                                                                                                                                                                               | NA    | NA                                                                                                                                                                                                          |
| BGAUMLB179 | 2011 | Greaves Road | +   | NA                                                                                                                                                                               | NA    | NA                                                                                                                                                                                                          |

|            |      |                   |     |                                                                                                                                                                                  |     |                                                                                                                                                                 |
|------------|------|-------------------|-----|----------------------------------------------------------------------------------------------------------------------------------------------------------------------------------|-----|-----------------------------------------------------------------------------------------------------------------------------------------------------------------|
| BGAUMLB180 | 2011 | Greaves Promenade | +   | NA                                                                                                                                                                               | NA  | NA                                                                                                                                                              |
| BGAUM186   | 2016 | Yarrowonga        | n   | NA                                                                                                                                                                               | NA  | <i>C. ovalisporum</i> , <i>Planktolyngbya</i> , <i>Cyanogranis</i> , <i>Aphanocapsa</i> ,                                                                       |
| BGAUM187   | 2016 | Yarrowonga        | n   | NA                                                                                                                                                                               | NA  | <i>C. ovalisporum</i> , <i>Planktolyngbya</i> , <i>Cyanogranis</i>                                                                                              |
| BGAUMLB189 | 2011 | Derrinal          | +   | NA                                                                                                                                                                               | NA  | NA                                                                                                                                                              |
| BGAUM190   | 2016 | Yarrowonga        | n   | NA                                                                                                                                                                               | NA  | <i>C. ovalisporum</i> , <i>Planktolyngbya</i> , <i>Aphanocapsa</i> , <i>Cyanogranis</i> , <b><i>Dolichospermum</i> sp. (84/0.02)</b> and <i>Microcystis</i>     |
| BGAUM194   | 2016 | Mulwala           | n   | NA                                                                                                                                                                               | NA  | <i>C. ovalisporum</i> , <i>Cyanogranis</i> , <i>Planktolyngbya</i>                                                                                              |
| BGAUM196   | 2016 | Echuca            | n   | NA                                                                                                                                                                               | NA  | <i>C. ovalisporum</i> , <i>Planktolyngbya</i> , <i>Cyanogranis</i>                                                                                              |
| BGAUMLB201 | 2011 | Greaves Road      | +   | NA                                                                                                                                                                               | NA  | NA                                                                                                                                                              |
| BGAUM202   | 2016 | Cobram            | n   | NA                                                                                                                                                                               | NA  | <i>C. ovalisporum</i> , <i>Chroococcales</i> , <i>Planktolyngbya</i> , <i>Pseudanabaena</i>                                                                     |
| BGAUM206   | 2016 | Barmah            | n   | NA                                                                                                                                                                               | NA  | <i>C. ovalisporum</i> , <i>Planktolyngbya</i> , <i>Chroococcales</i> , <b><i>C. issatschenkoi</i> (525/0.02)</b> , <b><i>Dolichospermum</i> sp. (99/0.007)</b>  |
| BGAUM211   | 2016 | Wemen             | +++ | KP036898.1 Uncultured cyanobacterium (100%), KM245024.1 <i>C. issatschenkoi</i> (99.7%), JF803655.1 <i>Aphanizomenon</i> sp.3 (99.4%), JF803647.1 <i>D. circinale</i> 86 (89.7%) | 0.4 | <i>C. ovalisporum</i> , <i>Chroococcales</i> , <i>Planktolyngbya</i> , <i>Microcystis</i> , <b><i>C. issatschenkoi</i> (7/0.0004)</b>                           |
| BGAUM212   | 2016 | Wemen             | +   | NA                                                                                                                                                                               | NA  | <i>C. ovalisporum</i> , <i>Chroococcales</i> , <i>Planktolyngbya</i> , <b><i>C. issatschenkoi</i> (20/0.001)</b> , <b><i>Dolichospermum</i> sp. (148/0.063)</b> |
| BGAUM216   | 2016 | Pental            | +   | NA                                                                                                                                                                               | 0.3 | <i>C. ovalisporum</i> , <i>Planktolyngbya</i> , <i>Chroococcales</i>                                                                                            |
| BGAUM217   | 2016 | Barmah            | n   | NA                                                                                                                                                                               | NA  | <i>C. ovalisporum</i> , <i>Chroococcales</i> , <i>Planktolyngbya</i> , <b><i>C. issatschenkoi</i> (539/0.03)</b> , <b><i>Dolichospermum</i> sp. (299/0.04)</b>  |
| BGAUM225   | 2016 | Piangil           | +   | NA                                                                                                                                                                               | 0.4 | <i>C. ovalisporum</i> , <i>Planktolyngbya</i> , <i>Chroococcales</i> , <b><i>C. issatschenkoi</i> (542/0.03)</b>                                                |
| BGAUM239   | 2016 | Nyah              | n   | NA                                                                                                                                                                               | NA  | NA                                                                                                                                                              |
| BGAUM254   | 2016 | Pental            | +++ | KP036898.1 Uncultured cyanobacterium (100%), KM245024.1 <i>C. issatschenkoi</i>                                                                                                  | 0.7 | <i>C. ovalisporum</i> , <i>Chroococcales</i> , <i>Planktolyngbya</i>                                                                                            |

|          |      |                   |     |                                                                                                                                                                                                    |       |                                                                                                                                                            |
|----------|------|-------------------|-----|----------------------------------------------------------------------------------------------------------------------------------------------------------------------------------------------------|-------|------------------------------------------------------------------------------------------------------------------------------------------------------------|
|          |      |                   |     | (99.7%), JF803655.1<br><i>Aphanizomenon</i> sp.3 (99.4%),<br>JF803647.1 <i>D. circinale</i> 86<br>(89.7%)                                                                                          |       |                                                                                                                                                            |
| BGAUM263 | 2016 | Nyah              | +++ | KP036898.1 Uncultured<br>cyanobacterium (100%),<br>KM245024.1 <i>C. issatschenkoi</i><br>(99.7%), JF803655.1<br><i>Aphanizomenon</i> sp.3 (99.4%),<br>JF803647.1 <i>D. circinale</i> 86<br>(89.7%) | 0.5   | <i>C. ovalisporum</i> , <i>Planktolyngbya</i> , <i>Chroococcales</i>                                                                                       |
| BGAUM269 | 2016 | Wemen             | +   | NA                                                                                                                                                                                                 | 0.3   | <i>C. ovalisporum</i> , <i>Microcystis</i> , <i>Chroococcales</i> , <b><i>C. issatschenkoi</i> (43/0.002)</b> , <b><i>Dolichospermum</i> sp. (67/0.02)</b> |
| BGAUM299 | 2016 | Torrumbarry       | +   | NA                                                                                                                                                                                                 | NA    |                                                                                                                                                            |
| BGAUM301 | 2016 | Piangil           | n   | NA                                                                                                                                                                                                 | <0.15 | <i>C. ovalisporum</i> , <i>Planktolyngbya</i> , <i>Chroococcales</i>                                                                                       |
| BGAUM313 | 2016 | Mulwala           | +   | NA                                                                                                                                                                                                 | NA    | <i>C. ovalisporum</i> , <i>Aphanocapsa</i> , <i>Chroococcales</i>                                                                                          |
| BGAUM324 | 2016 | Leitchville       | n   | NA                                                                                                                                                                                                 | NA    | NA                                                                                                                                                         |
| BGAUM372 | 2016 | Nyah              | n   | NA                                                                                                                                                                                                 | 0.3   | <i>C. ovalisporum</i> , <i>Planktolyngbya</i> , <i>Chroococcales</i>                                                                                       |
| BGAUM376 | 2016 | Pental            | +++ | KP036898.1 Uncultured<br>cyanobacterium (100%),<br>KM245024.1 <i>C. issatschenkoi</i><br>(99.7%), JF803655.1<br><i>Aphanizomenon</i> sp.3 (99.4%),<br>JF803647.1 <i>D. circinale</i> 86<br>(89.7%) | 0.8   | <i>C. ovalisporum</i> , <i>Chroococcales</i> , <i>Planktolyngbya</i>                                                                                       |
| BGAUM700 | 2017 | Picola            | +++ | JF803653.1 <i>Oscillatoria</i> sp. PCC<br>9240 (100%), %, KX016036 <i>P.</i><br><i>autumnale</i> CAWBG618 (100%)                                                                                   | >4    | <i>C. ovalisporum</i> , <i>Aphanocapsa</i> , <i>Planktolyngbya</i>                                                                                         |
| BGAUM701 | 2017 | Picola            | +++ | NA                                                                                                                                                                                                 | NA    | <i>C. ovalisporum</i> , <i>Aphanocapsa</i> , <i>Planktolyngbya</i>                                                                                         |
| BGAUM702 | 2017 | Goulburn<br>Weir  | +++ | Poor quality sequence                                                                                                                                                                              | 1     | <i>Chroococcales</i> , <i>Planktolyngbya</i> , <i>C. ovalisporum</i> ,<br><i>Romeria</i>                                                                   |
| BGAUM704 | 2017 | Kirwans<br>bridge | +++ | KT246302.1 Uncultured<br>cyanobacterium (94.7%),<br>JF803647.1 <i>D. circinale</i> 86<br>(94.7%), JF803655.1                                                                                       | >4    | <i>C. ovalisporum</i> , <i>Chroococcales</i> , <i>Planktolyngbya</i> ,<br><b><i>Dolichospermum</i> sp.</b>                                                 |



|          |      |                |     |                                                                                                                                                                                                    |       |                                                                                                                                                                                                 |
|----------|------|----------------|-----|----------------------------------------------------------------------------------------------------------------------------------------------------------------------------------------------------|-------|-------------------------------------------------------------------------------------------------------------------------------------------------------------------------------------------------|
|          |      |                |     | <i>Aphanizomenon</i> sp.3,<br>KM245024.1 <i>C. issatschenkoi</i><br>(90%)                                                                                                                          |       |                                                                                                                                                                                                 |
| BGAUM709 | 2017 | Boonie<br>Doon | ++  | JF803653.1 <i>Oscillatoria</i> sp. PCC<br>9240 (100%), %, KX016036 <i>P.</i><br><i>autumnale</i> CAWBG618 (100%)                                                                                   | 1.5   | <i>Planktolyngbya</i> , <i>Pseudanabaena</i> , <i>Aphanocapsa</i> ,<br><i>Merismopidia</i> , <b><i>Phormidium</i> (1178/0.11)</b> , <i>Cyanogranis</i> ,<br><i>Microcystis</i>                  |
| BGAUM710 | 2017 | Numurkah       | ++  | KP036898.1 Uncultured<br>cyanobacterium (100%),<br>KM245024.1 <i>C. issatschenkoi</i><br>(99.7%), JF803655.1<br><i>Aphanizomenon</i> sp.3 (99.4%),<br>JF803647.1 <i>D. circinale</i> 86<br>(89.7%) | 0.2   | <b><i>Dolichospermum</i> sp. (4,754,287/1331.2)</b> , <i>Microcystis</i> ,<br><i>Planktolyngbya</i> , <i>Pseudanabaena</i> ,                                                                    |
| BGAUM711 | 2017 | Waranga        | n   | NA                                                                                                                                                                                                 | <0.15 | <i>C. ovalisporum</i> , <i>Aphanothece</i> , <i>Aphanocapsa</i> , <b><i>D.</i></b><br><b><i>circinale</i> (7827/1.95)</b> , <i>Cyanogranis</i> , <i>Cyanodictyon</i> ,<br><i>Planktolyngbya</i> |
| BGAUM714 | 2017 | Katandra       | n   | NA                                                                                                                                                                                                 | <0.15 | <i>Chroococcales</i> , <i>C. ovalisporum</i> , <i>Planktolyngbya</i> ,<br><b><i>Phormidium</i> (8947/1.07)</b> , <i>Leptolyngbya</i> ,<br><i>Pseudanabena</i>                                   |
| BGAUM716 | 2017 | Rushworth      | n   | NA                                                                                                                                                                                                 | <0.15 | <i>C. ovalisporum</i> , <i>Chroococcales</i> , <i>Snowella</i> ,<br><i>Psuedanabaena</i> ,                                                                                                      |
| BGAUM720 | 2017 | Numurkah       | +++ | KT246302.1 Uncultured<br>cyanobacterium (94.7%),<br>JF803647.1 <i>D. circinale</i> 86<br>(94.7%), JF803655.1<br><i>Aphanizomenon</i> sp.3,<br>KM245024.1 <i>C. issatschenkoi</i><br>(90%)          | NA    | <i>Chroococcales</i> , <i>Planktolyngbya</i> , <b><i>Dolichospermum</i> sp.</b><br><b>(1042/0.17)</b>                                                                                           |

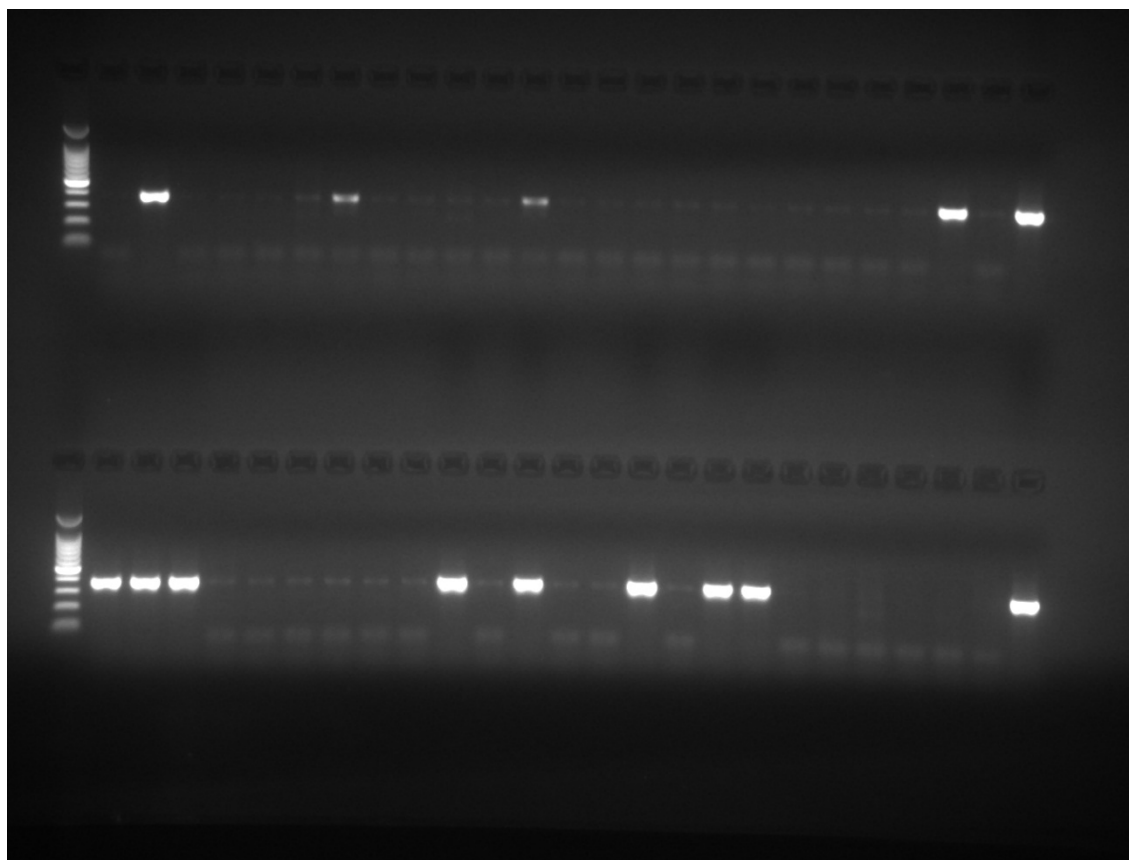

Figure S1. Uncropped, full-length gel image of the nested PCR results of anatoxin-a synthetase C (*anaC*) gene of a subset of cyanobacterial bloom samples separated by 1.5 % agarose gel electrophoresis.
